# Supplementary material
Source: MDPI journal article supplement (https://www.mdpi.com/2227-9717/10/10/1981)
Supplement: s1 [file s1]

Archive with 1 entries (1 files):
- processes-1918472-supplementary.pdf
